# Supplementary material
Source: publisher figshare collection journal article supplement (https://plos.figshare.com/articles/dataset/_/6837131)
Supplement: Supplementary file [file 1]

S6 Fig

A

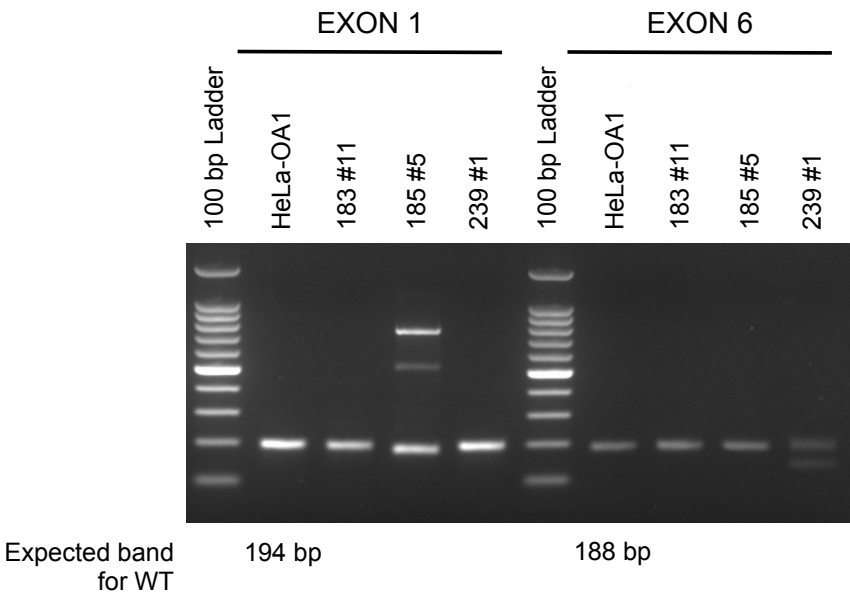

B

EXON 1

HeLa-OA1 (WT)    CCATTACGG**CGCGGACTTCCAAGACCTGCGG**CCGGACGCTT

183 #11    CCATTACGG**CGCGGACTTCCAAGAC-TGCGG**CCGGACGCTT      Allele 1 → single base deletion

C

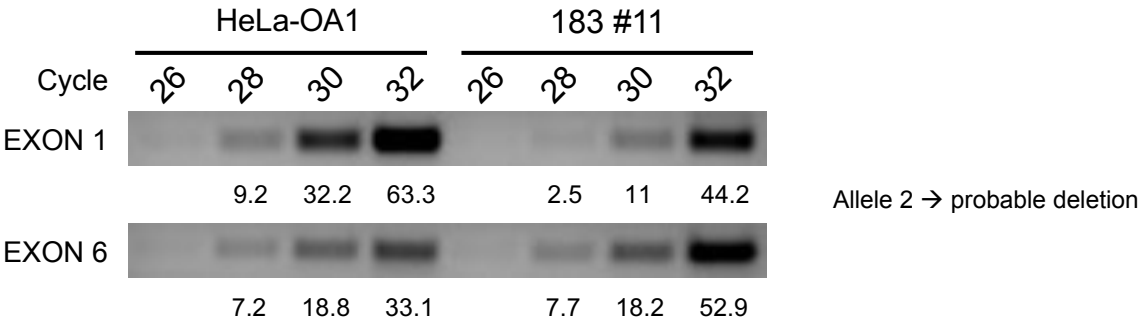

D

EXON 6

HeLa-OA1 (WT)    GGAGGACACAG**GAACGGCTGCCATTCTACATGG**AGGCTCTCCT

239 #1    GGAGGACACAG**GAACGGCTGCCATTCT**A**CATGG**AGGCTCTCCT      Allele 1 → single base insertion

239 #1    ---**Δ48bp**-----**CATGG**AGGCTCTCCT      Allele 2 → 48 bp deletion
