# Supplementary material
Source: publisher figshare collection journal article supplement (https://plos.figshare.com/articles/dataset/_/6837131)
Supplement: Supplementary file [file 1]

S7 Fig

A

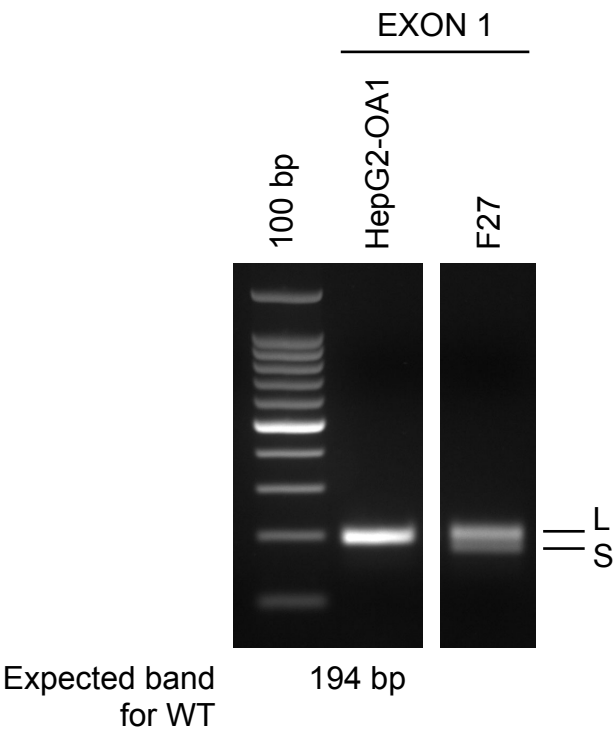

B

|                | EXON 1                                       |                             |
|----------------|----------------------------------------------|-----------------------------|
| HepG2-OA1 (WT) | GACTTCCAAGACCTGCGGCCGGACGCTTGCGGACCGGTAGGA   |                             |
| F27 L          | GACTTCCAAGACCTGCGGCCGGACGCAATTGCGGACCGGTAGGA | Allele 1 → two bp insertion |
| F27 S          | GACTTCC-----Δ18 bp-----TTGCGGACCGGTAGGA      | Allele 2 → 18 bp deletion   |
